# Supplementary material for: Local and distal effects of arbuscular mycorrhizal colonization on direct pathway Pi uptake and root growth in Medicago truncatula
Source: PubMed Central journal article supplement (PMC4473995; doi:10.1093/jxb/erv202), 2015-05-04
Supplement: supp_erv202_jexbot144204_file001.pdf [file supp_erv202_jexbot144204_file001.pdf]

## Supplementary material

Table S1. ANOVA summary table for all response variables.

| (A)                         | <i>P</i> | <i>C</i> | <i>P*C</i> |
|-----------------------------|----------|----------|------------|
| Colonisation (pot A)        | ns       | ***      | ns         |
| Colonisation (pot B)        | **       | ***      | *          |
| SDW                         | ***      | ns       | **         |
| RDW (total)                 | ***      | ns       | *          |
| Root length (total)         | ***      | **       | *          |
| Shoot P content             | ***      | ns       | ***        |
| Root P content (total)      | ***      | ***      | ***        |
| Root P conc. (pot A)        | ***      | ***      | ***        |
| Root P conc. (pot B)        | ***      | ***      | ***        |
| Pot A P uptake              | **       | **       | ***        |
| Shoot PO <sub>4</sub> conc. | ***      | **       | ns         |

  

| (B)                         | <i>G</i> | <i>C</i> | <i>G*C</i> |
|-----------------------------|----------|----------|------------|
| Colonisation (pot A)        | ns       | ***      | ns         |
| Colonisation (pot B)        | ***      | ***      | ***        |
| SDW                         | ***      | ns       | *          |
| RDW (total)                 | **       | ns       | ns         |
| Root length (total)         | ns       | **       | ns         |
| Shoot P content             | ***      | ns       | ***        |
| Root P content (total)      | ***      | **       | ***        |
| Root P conc. (pot A)        | ***      | ***      | ***        |
| Root P conc. (pot B)        | ***      | ***      | ***        |
| Pot A P uptake              | **       | ***      | ***        |
| Shoot PO <sub>4</sub> conc. | *        | ns       | *          |

Factors in the analysis were (A) *P* and *C*, (B) *G* and *C*. Both main effects and interaction terms are indicated. *P* Soil P Addition, *C* Pot Configuration, *G* Genotype.

\* $P < 0.05$ ; \*\* $P < 0.01$ ; \*\*\* $P < 0.0001$ .

Table S2. Mycorrhizal colonisation (% of root length) of *mtpt4* mutant genotype, grown at 20 mg P kg<sup>-1</sup>. Values are mean ± standard error, *n*=5. Means followed by the same letter were not significantly different at the *P*<0.05 level (Tukey's HSD).

|       |      | M,M  | NM,M | NM,NM |
|-------|------|------|------|-------|
| Pot A | mean | 35.6 | 0    | 0     |
|       | s.e. | 4.9  | 0    | 0     |
| Pot B | mean | 35.2 | 31.7 | 0     |
|       | s.e. | 5.9  | 3.7  | 0     |

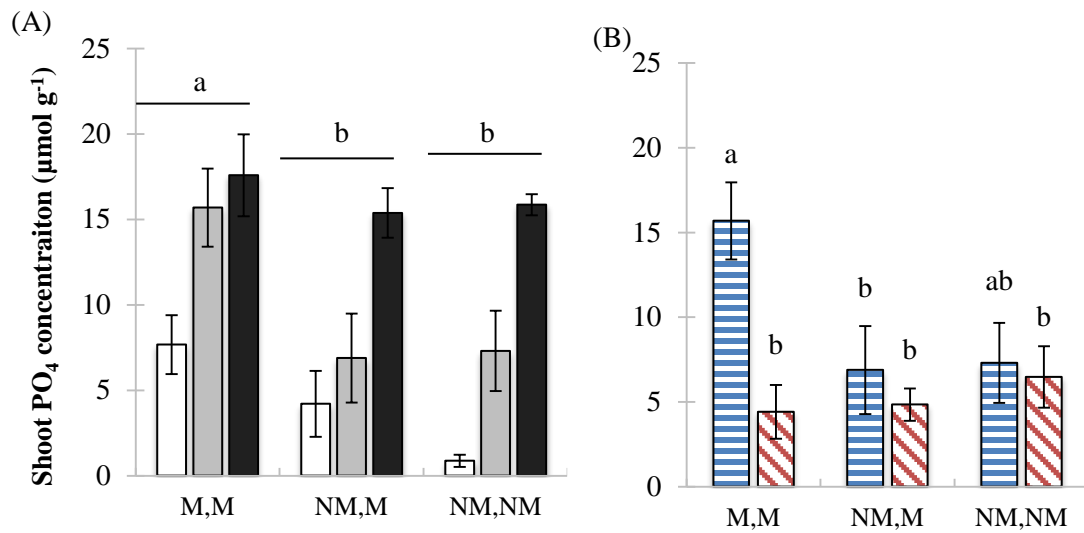

Figure S1. Inorganic phosphate (PO<sub>4</sub>) concentration in shoots.

PO<sub>4</sub> concentration (μmol g<sup>-1</sup>) in the fresh shoots of (A) wild-type plants at three soil P additions: 0 (white bars), 20 (grey bars) and 50 (black bars) mg P kg<sup>-1</sup>, and in (B) wild-type (horizontal bars) and *mtpt4* mutant (diagonal bars) at P20 only. Values are mean ± standard error, *n*=4. Means followed by the same letter were not significantly different at the *P*<0.05 level (Tukey's HSD). See text for details of statistical analysis.
